# Supplementary material
Source: publisher figshare collection journal article supplement (https://frontiersin.figshare.com/ndownloader/files/21817623)
Supplement: Supplementary file 2 [file 21817623]

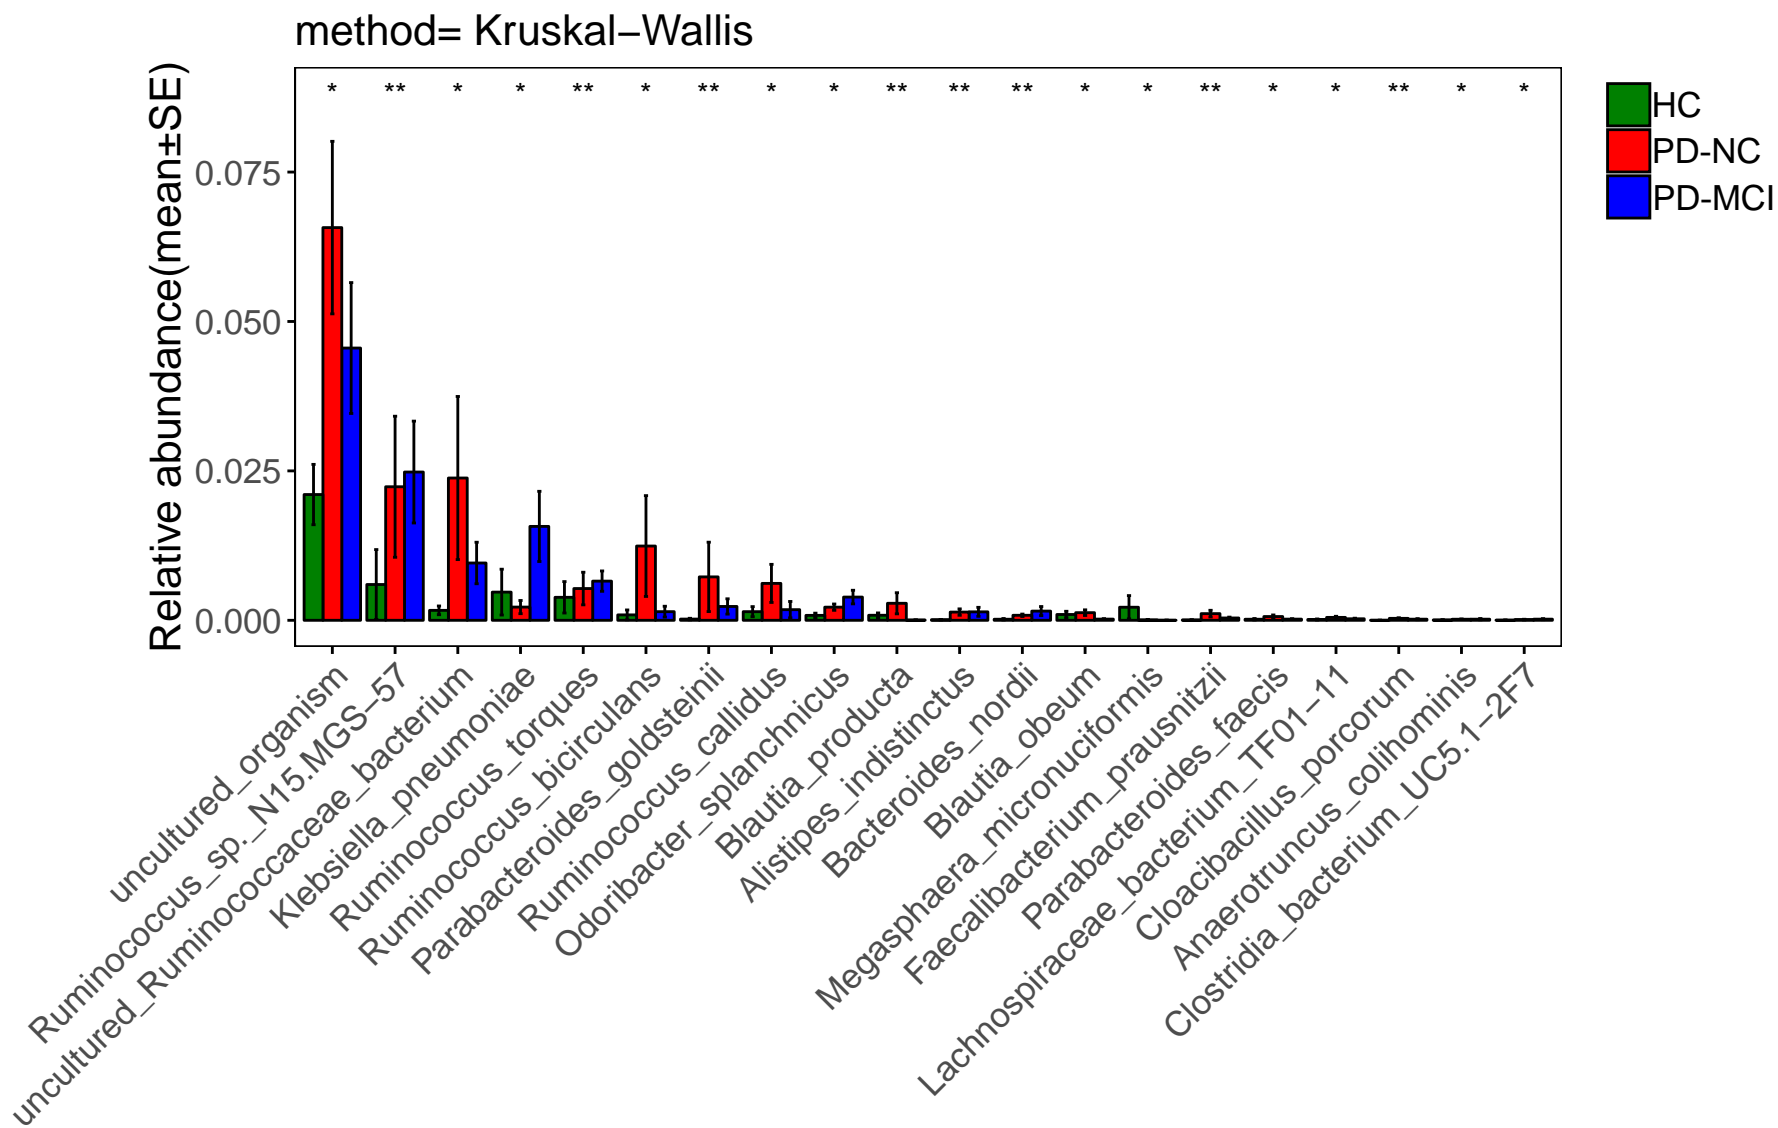

Figure S7: Significant microbiome (plot top 20) at species level after statistic method of Kruskal-Wallis. \* $P < 0.05$ ; \*\* $P < 0.01$ .
