# Supplementary material
Source: publisher figshare collection journal article supplement (https://frontiersin.figshare.com/ndownloader/files/21817623)
Supplement: Supplementary file 5 [file 21817623]

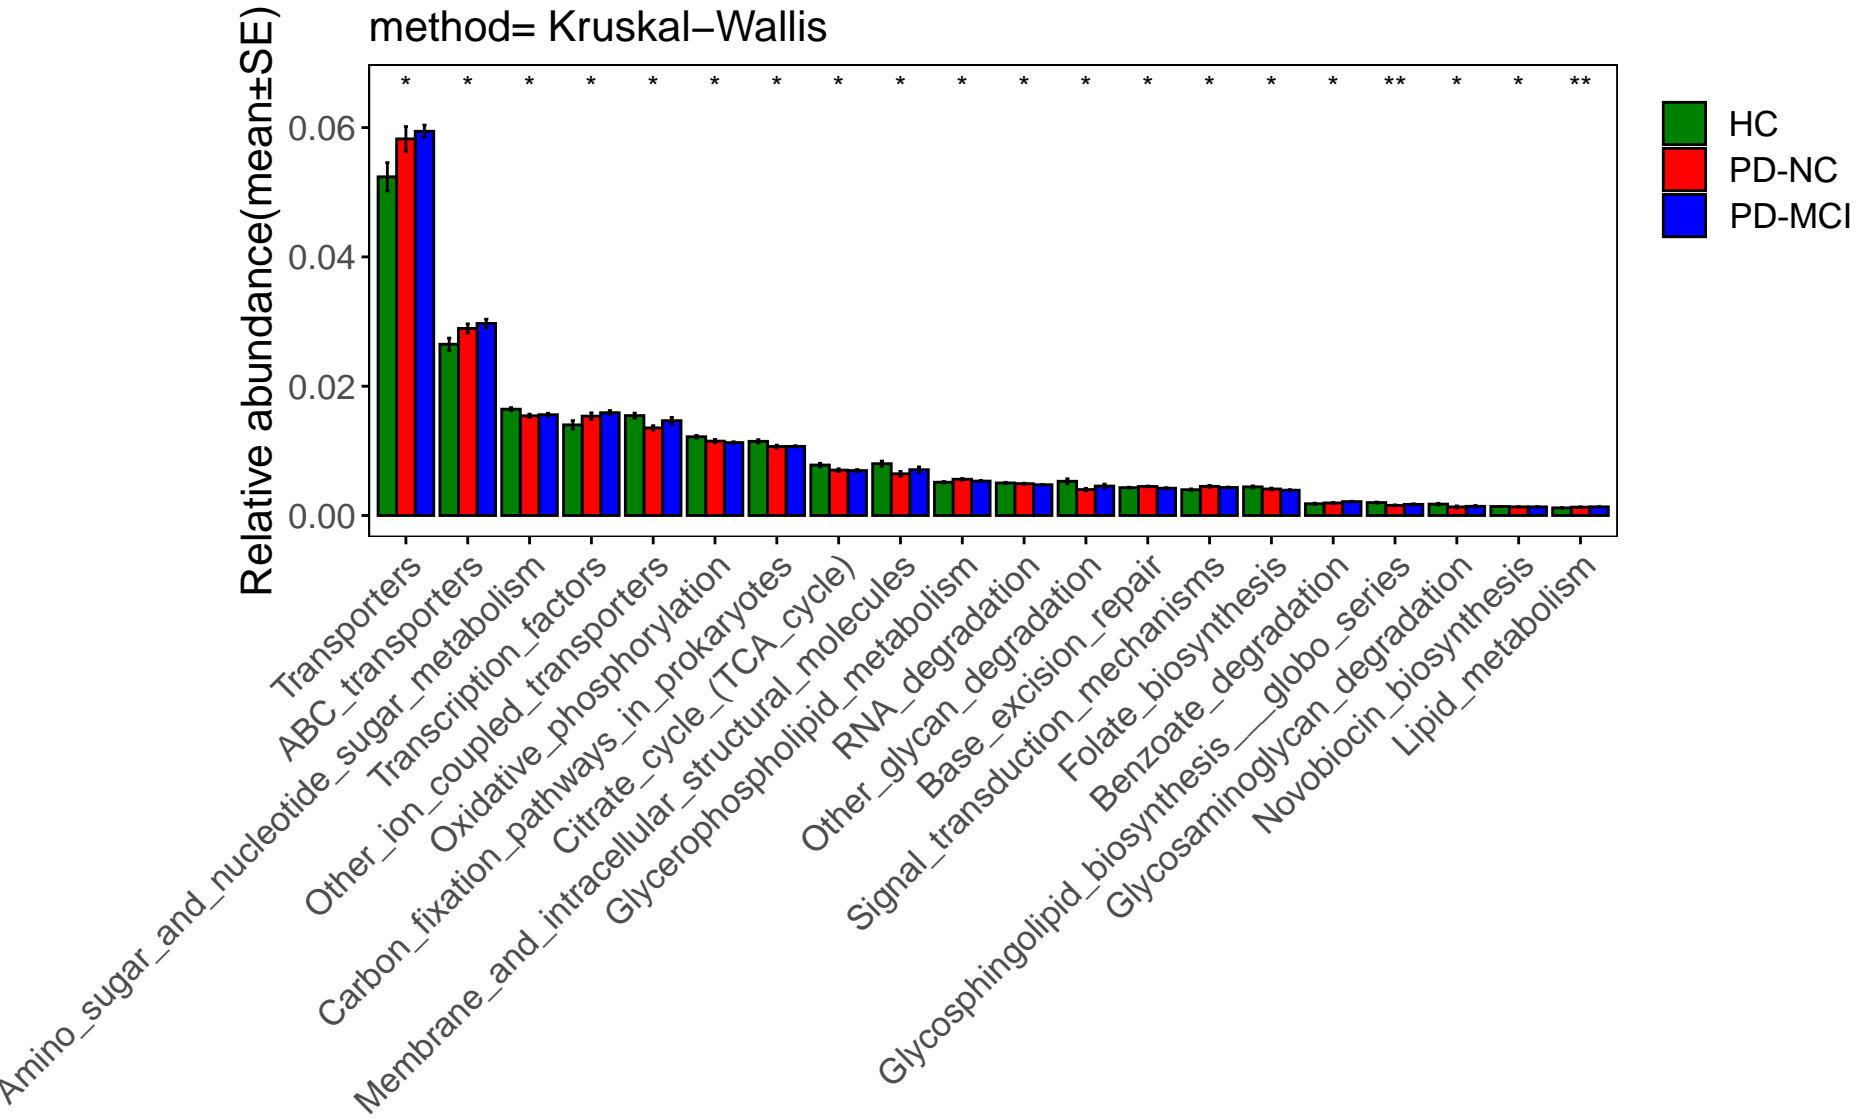

Figure S4c: Significant KEGG pathways at level 3 for the fecal microbiome of the PD-MCI, PD-NC and healthy groups. \*P<0.05; \*\*P<0.01.
