# Supplementary material
Source: publisher figshare collection journal article supplement (https://frontiersin.figshare.com/ndownloader/files/21817623)
Supplement: Supplementary file 6 [file 21817623]

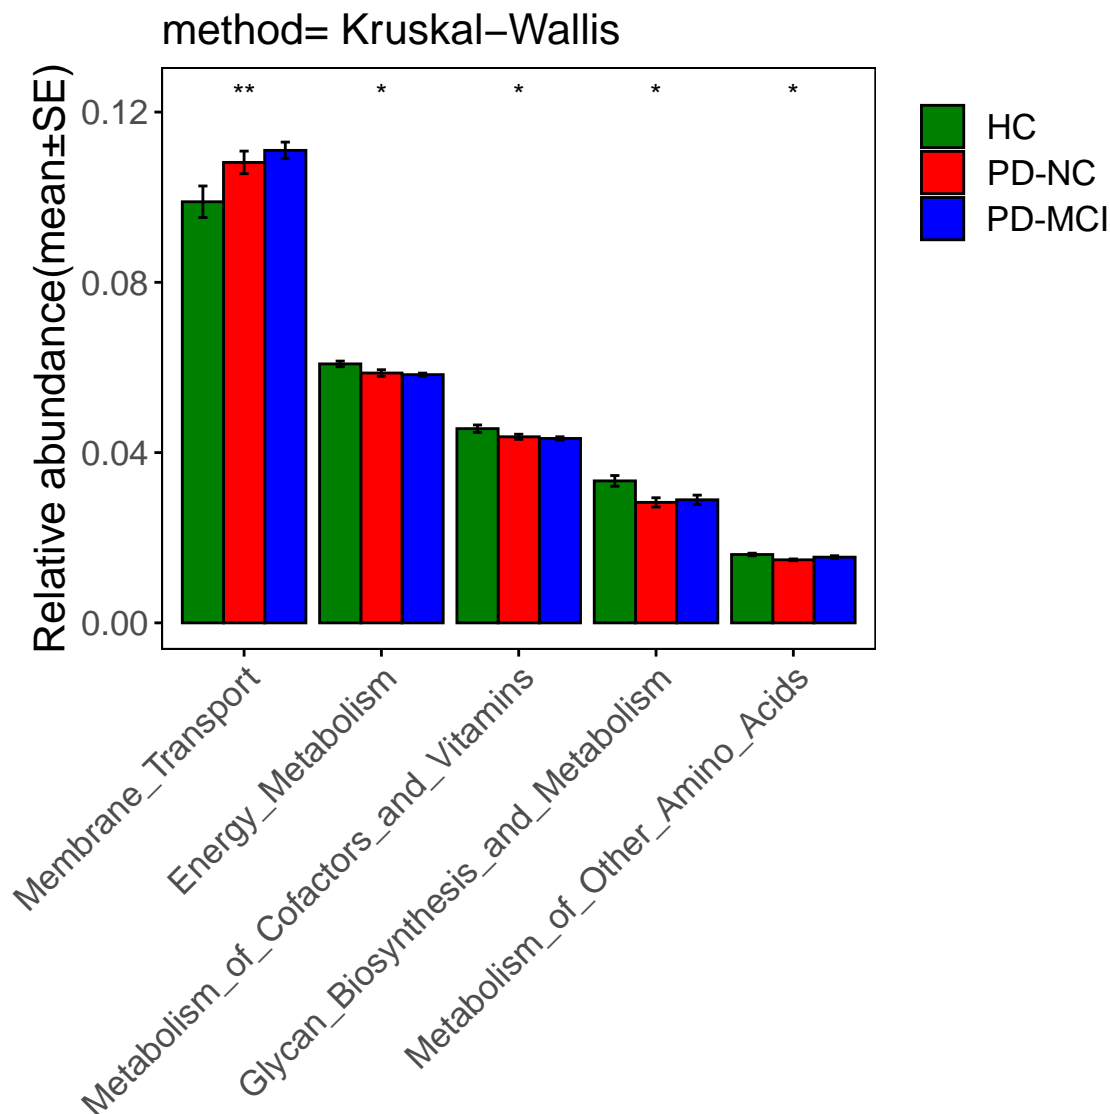

Figure S4b: Significant KEGG pathways at level 2 for the fecal microbiome of the PD-MCI, PD-NC and healthy groups. \* $P < 0.05$ ; \*\* $P < 0.01$ .
