# Supplementary material
Source: publisher figshare collection journal article supplement (https://frontiersin.figshare.com/ndownloader/files/21817623)

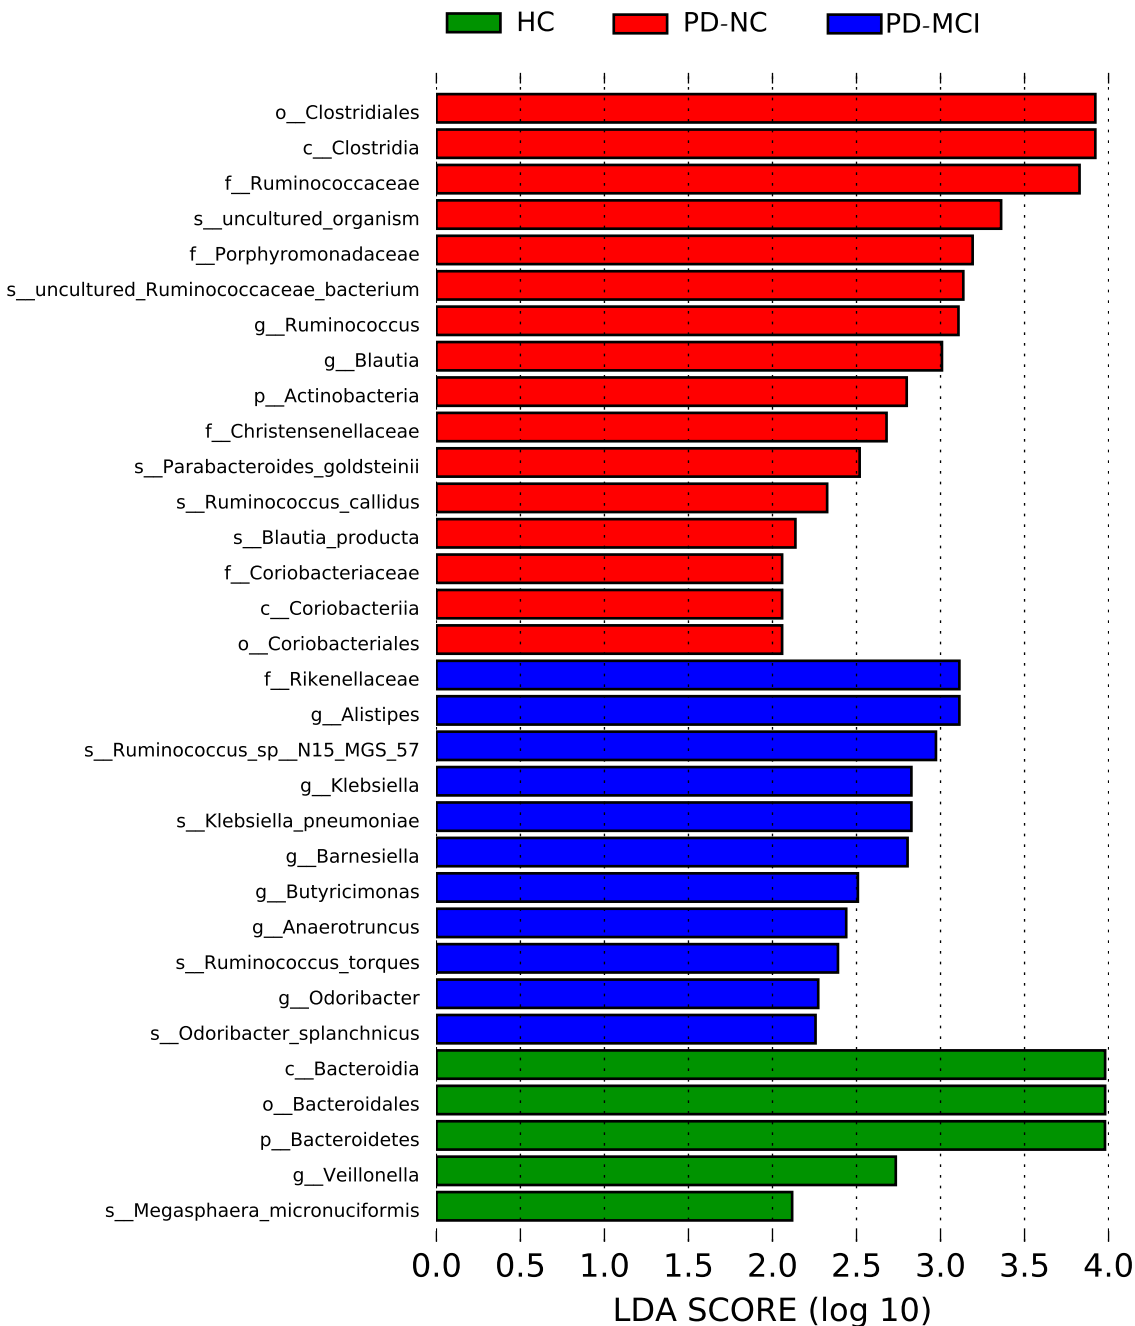

Figure S3. Alteration in the taxa between PD-MCI, PD-NC and healthy groups(LDA)

Supplement: Supplementary file 3 [file 21817623]

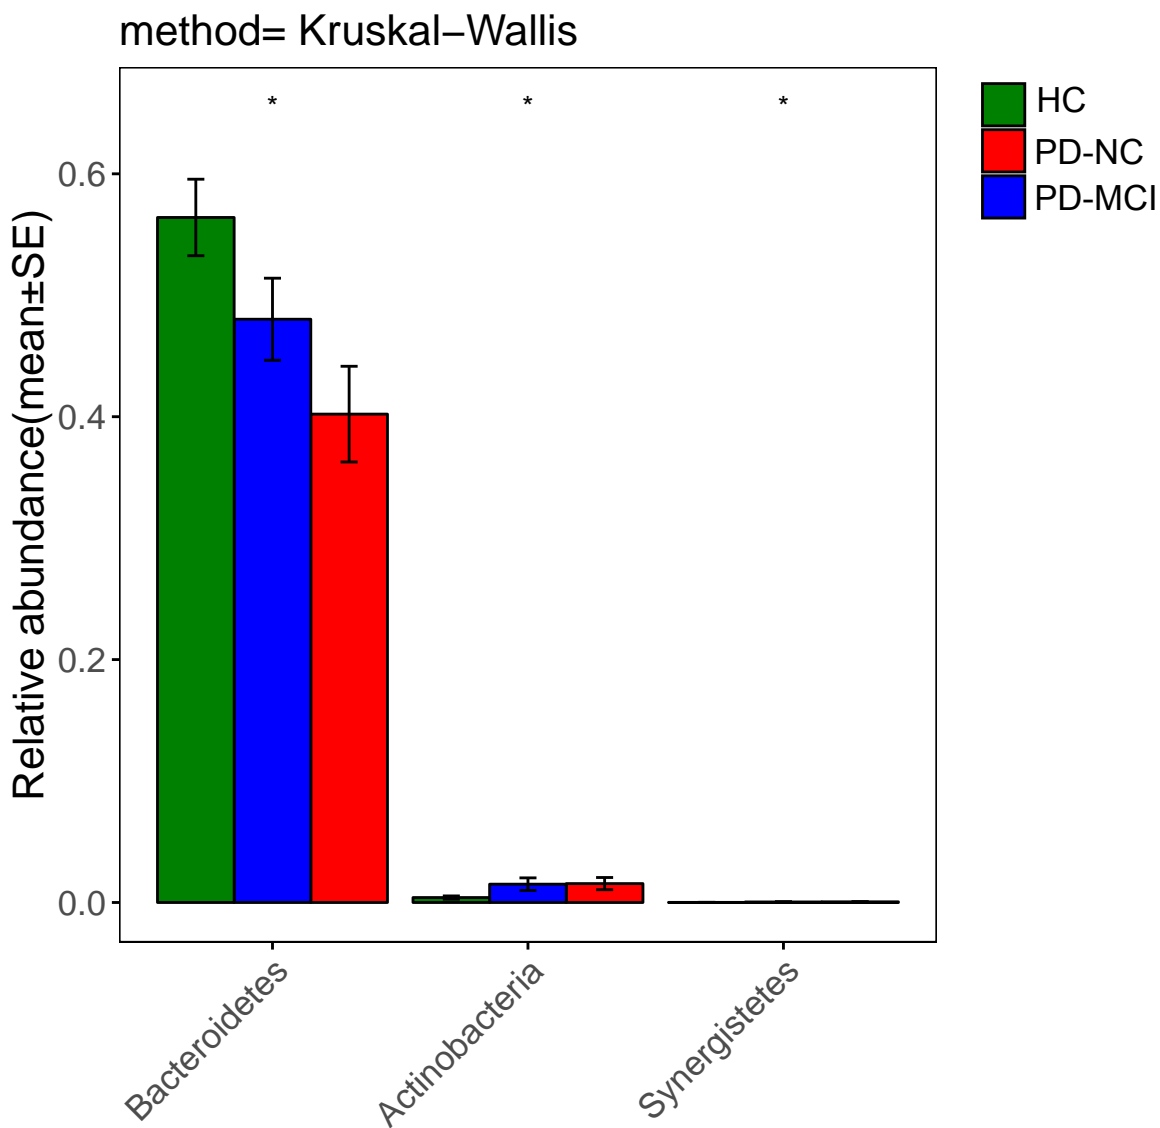

**Figure S2. Bacteroidetes were typically the dominant phyla in PD-NC, PD-MCI and healthy controls. \*P<0.05.**

Supplement: Supplementary file 4 [file 21817623]

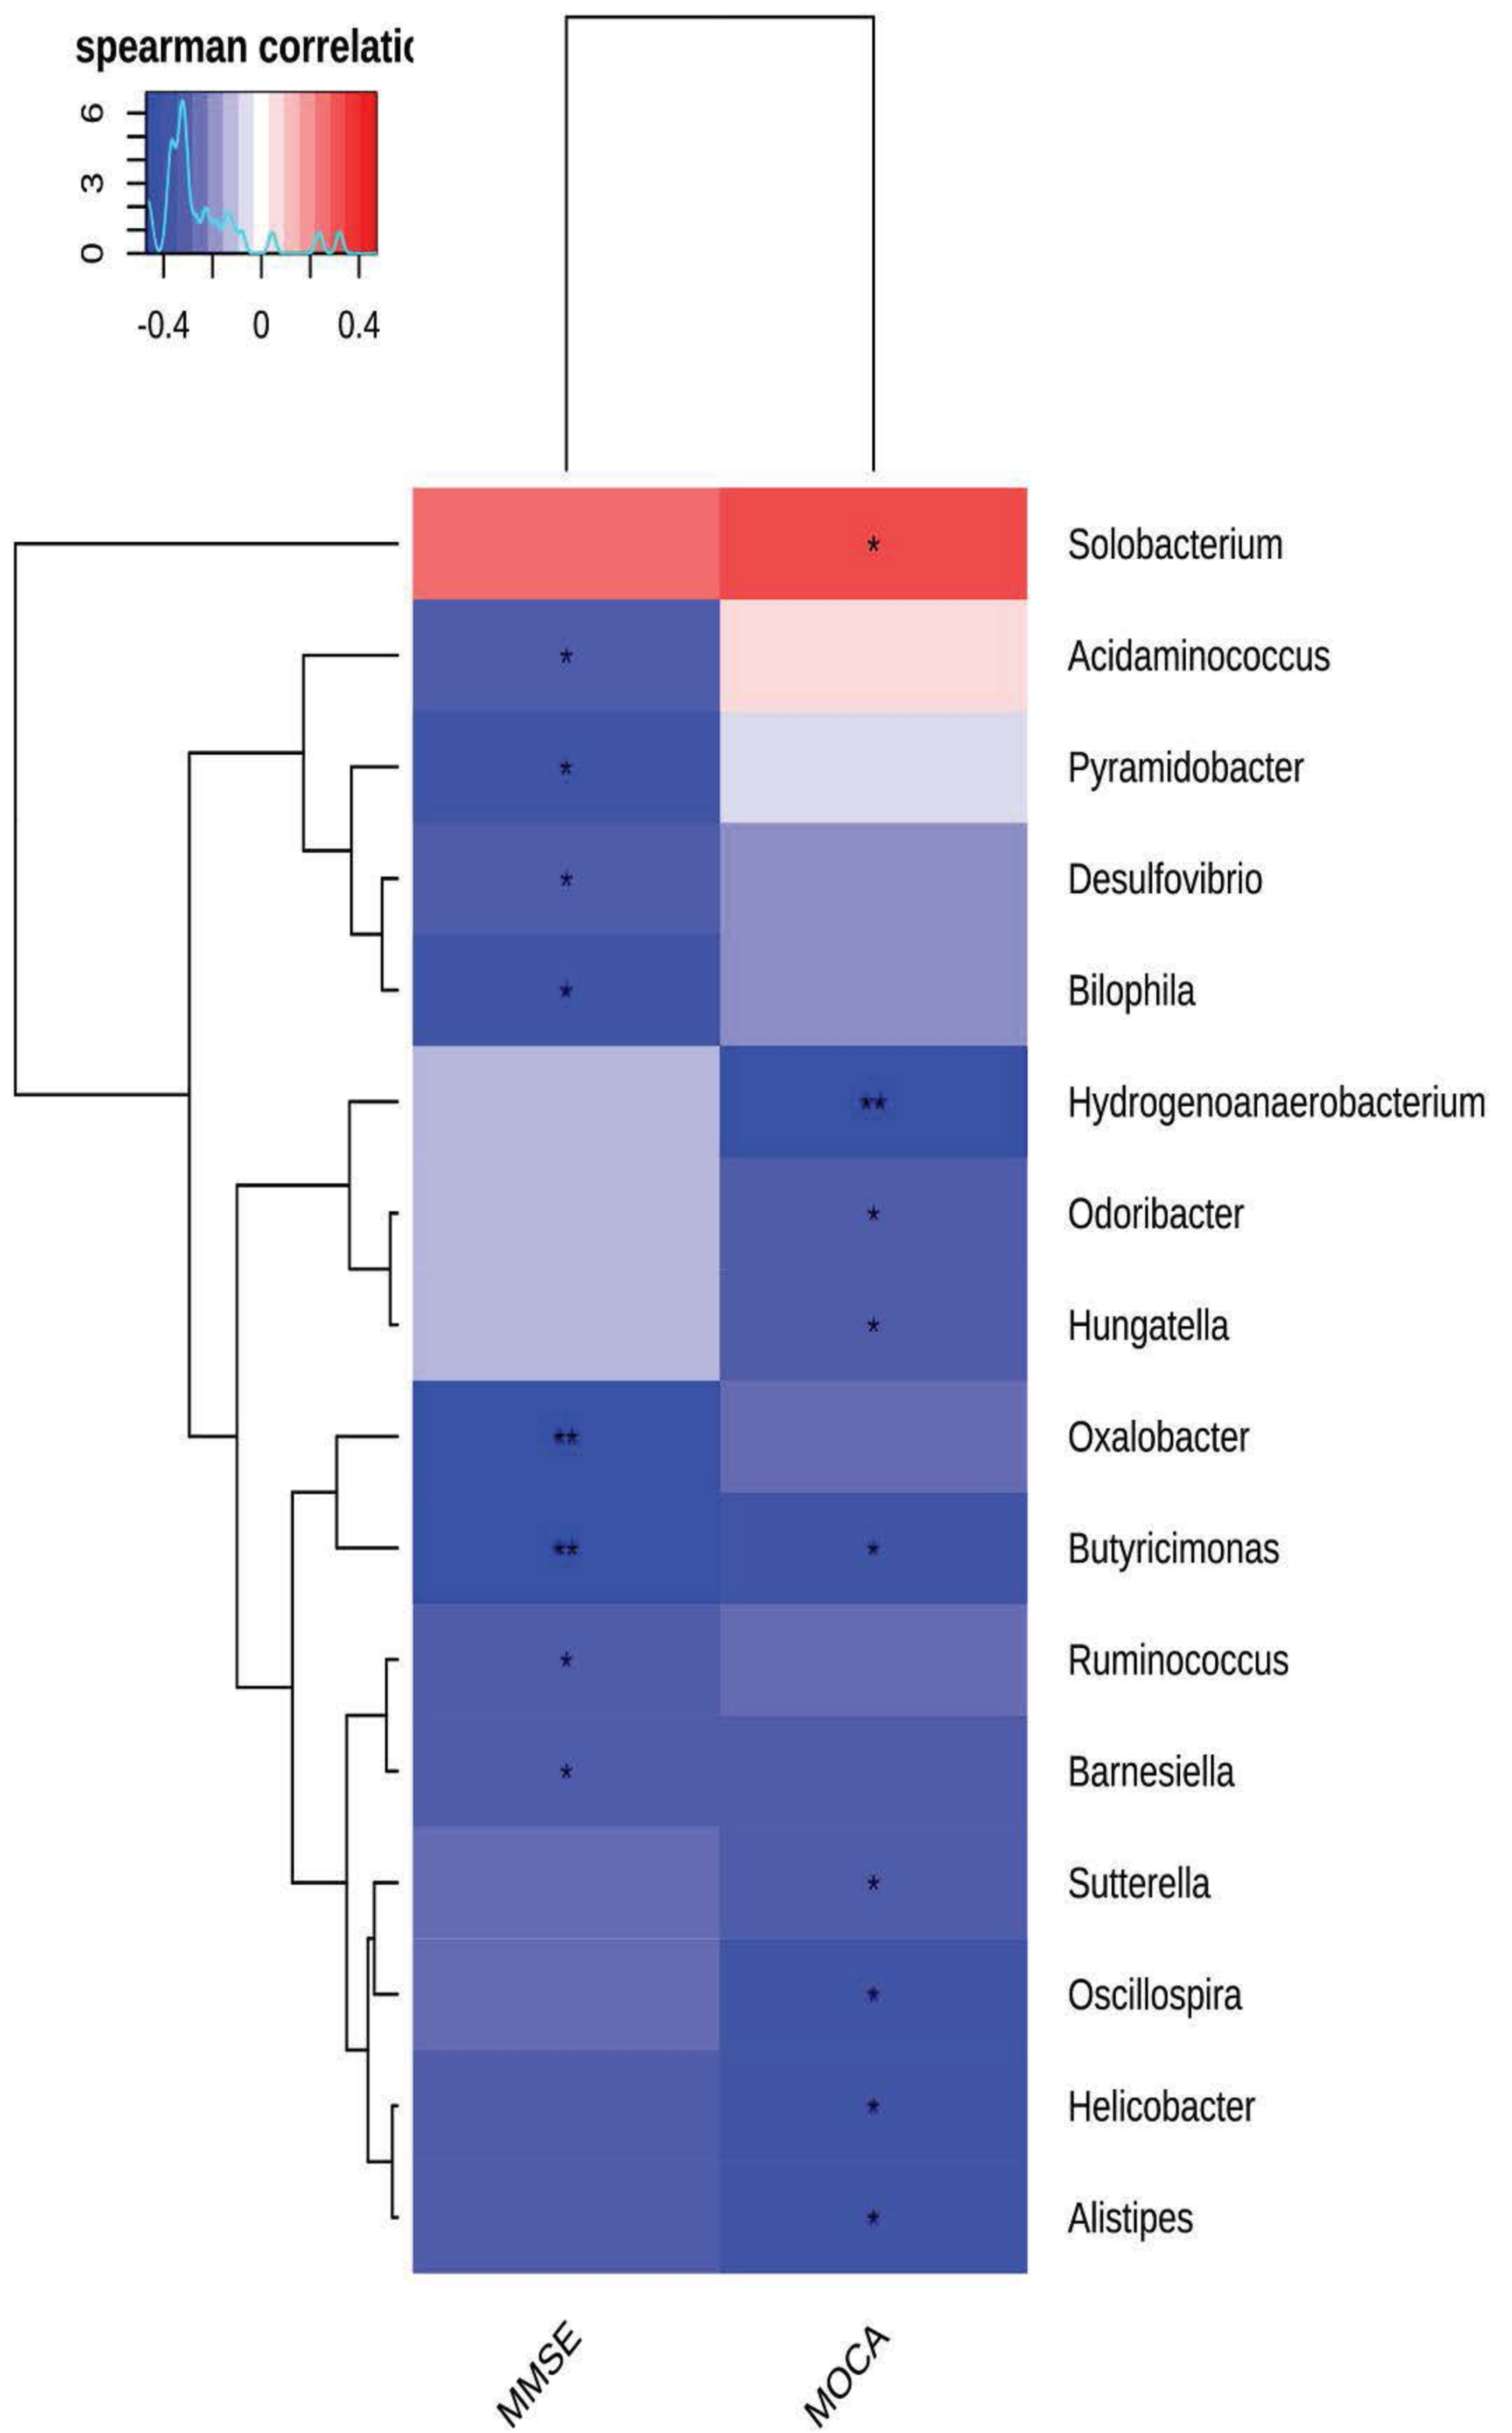

Figure S5. Correlation between fecal microbiota and MMSE, MoCA scores. \* $P < 0.05$ ; \*\* $P < 0.01$ .

Supplement: Supplementary file 7 [file 21817623]

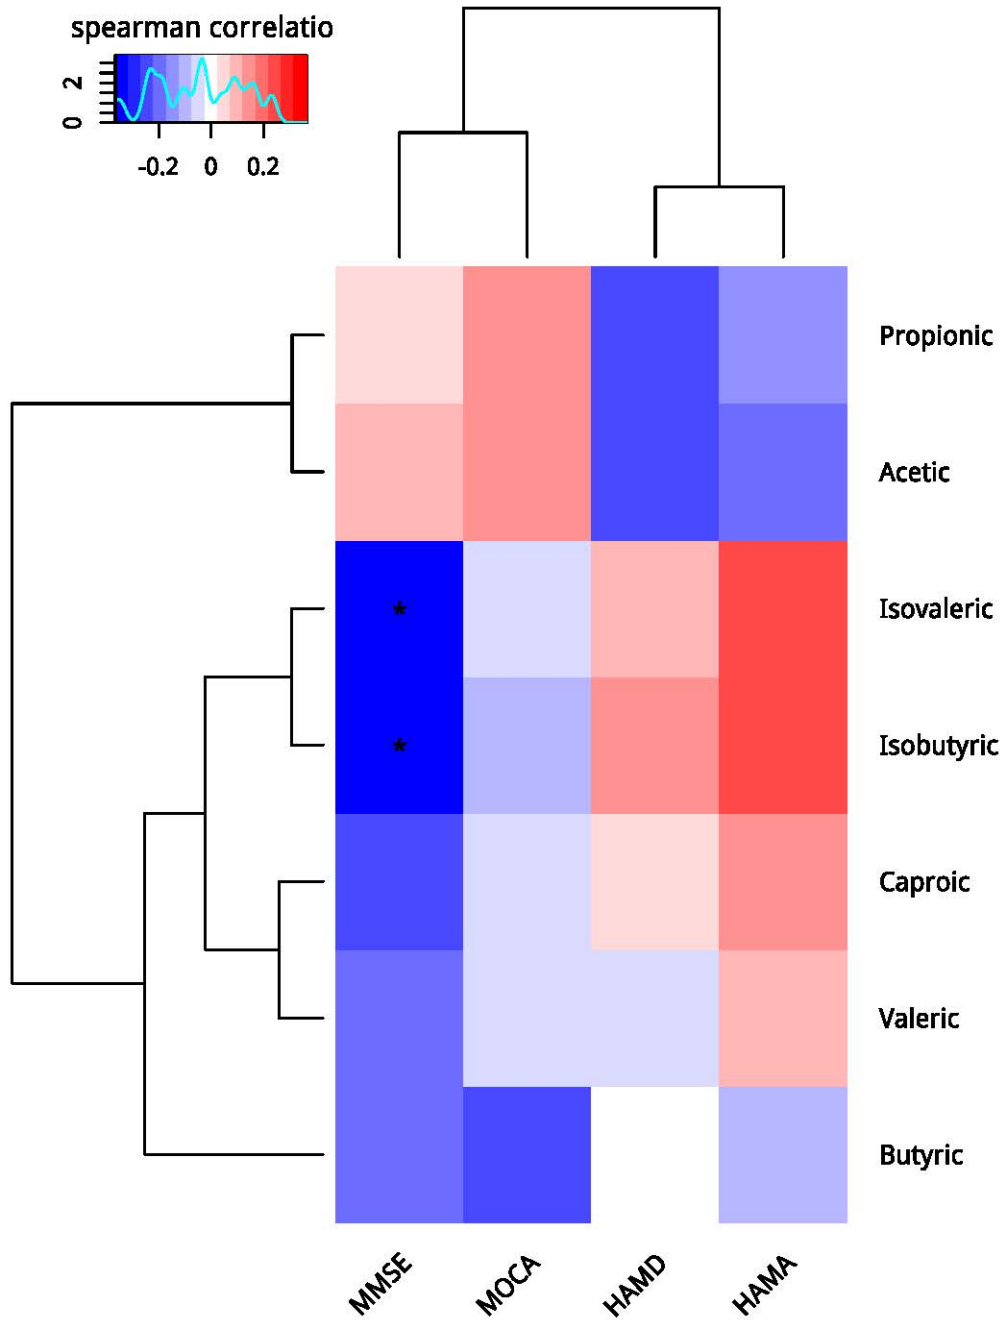

Figure S6. Association between SCFAs and cognitive ability. \* $P < 0.05$ .

Supplement: Supplementary file 8 [file 21817623]

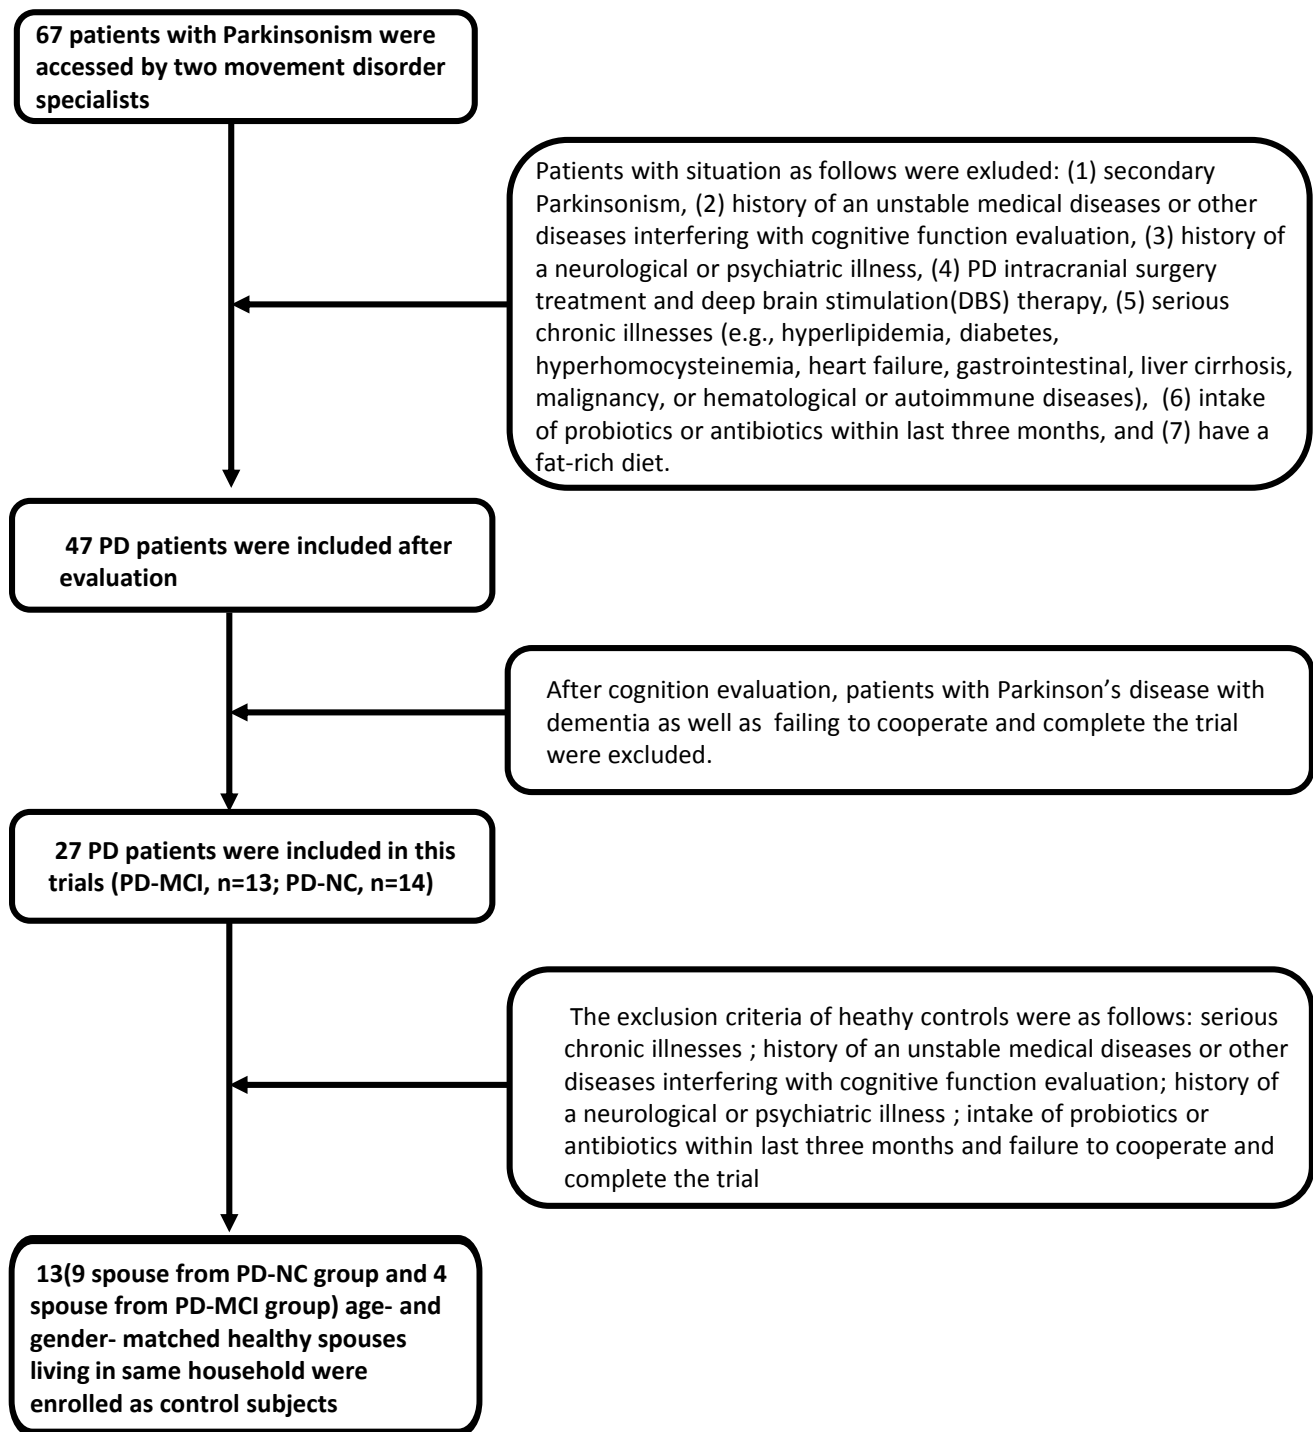

**Figure S1. Flow diagram of recruiting patients with PD-NC, PD-MCI and healthy controls.**

Supplement: Supplementary file 9 [file 21817623]
